# Supplementary material for: Combined Effects of Color and Elastic Modulus on Antifouling Performance: A Study of Graphene Oxide/Silicone Rubber Composite Membranes
Source: MDPI journal article supplement (doi:10.3390/ma12162608), 2019-08-16
Supplement: s1 [file s1]

## Supplementary Materials

# Combined Effects of Color and Elastic Modulus on Antifouling Performance: A Study of Graphene Oxide/Silicone Rubber Composite Membranes

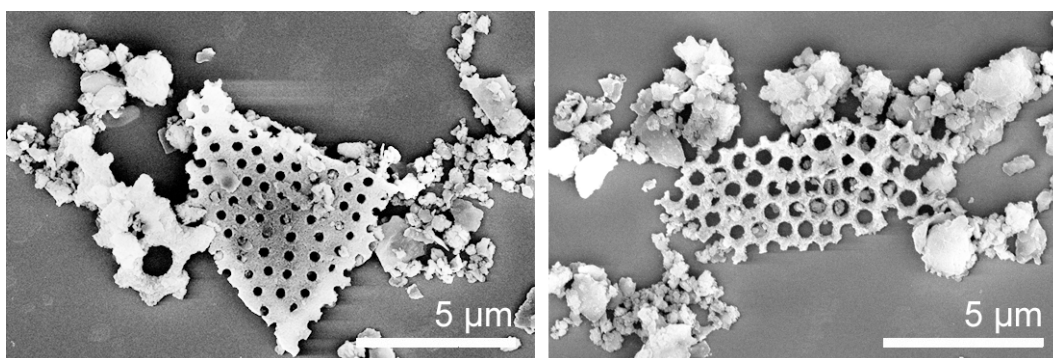

**Figure S1.** SEM images of diatoms (*Triceratium* sp.) on silicon slice after culturing for 2 days.

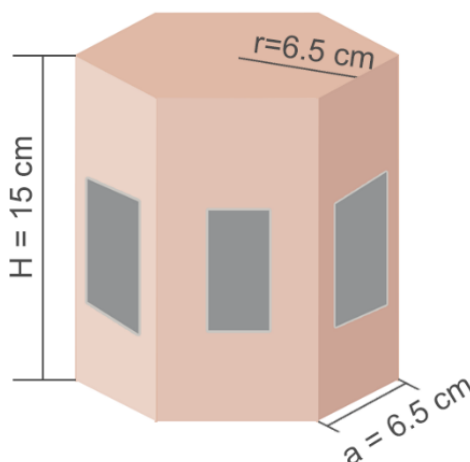

**Figure S2.** Specimens were fixed to a hexagonal prism.

The linear velocity ( $V$ ) near the specimens is determined by  $V = 2 \times \pi \times r \times \omega$ , where  $\omega$  is the rotation speed. In our test,  $\omega = 500$  rad/min. Therefore,  $V = 3.4$  m/s.

The Reynolds number ( $Re$ ) is an important dimensionless quantity in fluid mechanics that helps help predict the flow patterns in different fluid flow situations.  $Re$  is determined by the following equation:

$$Re = \frac{\rho V d_H}{\mu} \quad (1)$$

where

$$d_H = \frac{2ab}{a+b} \quad (2)$$

**Table S1.** Nomenclature and values.

| Nomenclature |                                                          | Value                             |
|--------------|----------------------------------------------------------|-----------------------------------|
| $\rho$       | water density                                            | 0.997 g/cm <sup>3</sup> (25 °C)   |
| $V$          | rate of water flow                                       | 3.4 m/s                           |
| $d_H$        | hydraulic diameter of rectangular tube (fully filled)    |                                   |
| $\mu$        | dynamic viscosity                                        | 0.00089 Ns/m <sup>2</sup> (25 °C) |
| $a, b$       | width and height of the section of the tube in test area | $a = 6.5$ cm and $b = 15$ cm      |

The results show that  $Re = 3.45 \times 10^5$ , which is much bigger than 4000; hence, there is turbulent flow in the test area, namely it is a turbulence generator.

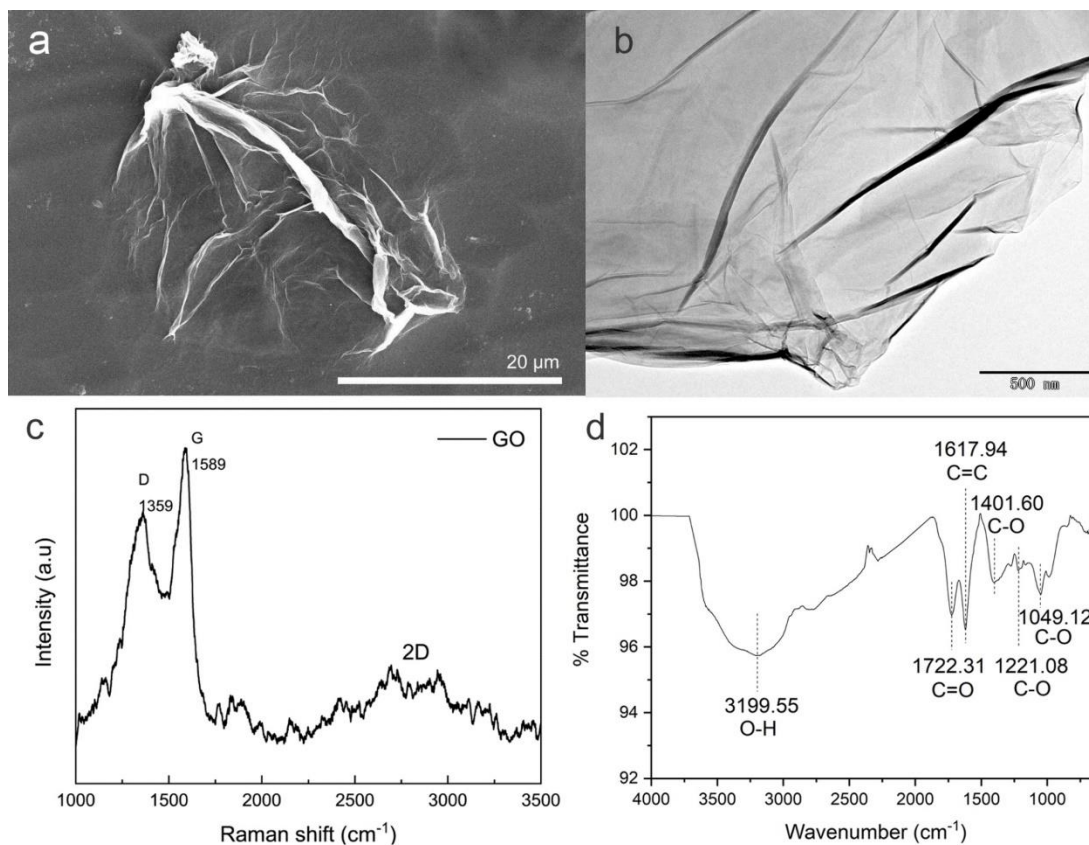

**Figure S3.** (a) SEM image of GO nanosheets, (b) TEM image of GO nanosheets, (c) Raman spectra of GO nanosheets, (d) FTIR spectra of GO nanosheets.

**Table S2.** Elemental compositions of membranes.

| Elements/Specimens | 0     | 0.16  | 0.36  | 0.64  | 1.28  | 2.56  |
|--------------------|-------|-------|-------|-------|-------|-------|
| C wt %             | 30.02 | 47.99 | 57.88 | 58.02 | 65.45 | 80.43 |
| O wt %             | 33.43 | 38.21 | 32.11 | 36.16 | 32.66 | 18.94 |
| Si wt %            | 36.55 | 13.8  | 10.02 | 5.81  | 1.89  | 0.63  |

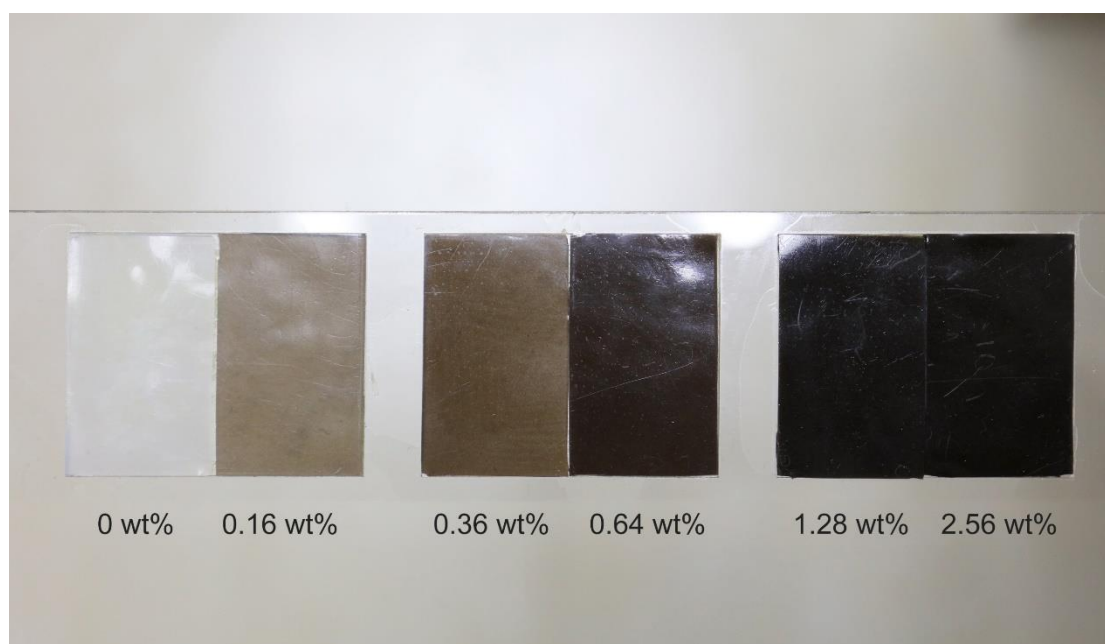

Figure S4. Colors of the membranes with different GO contents.

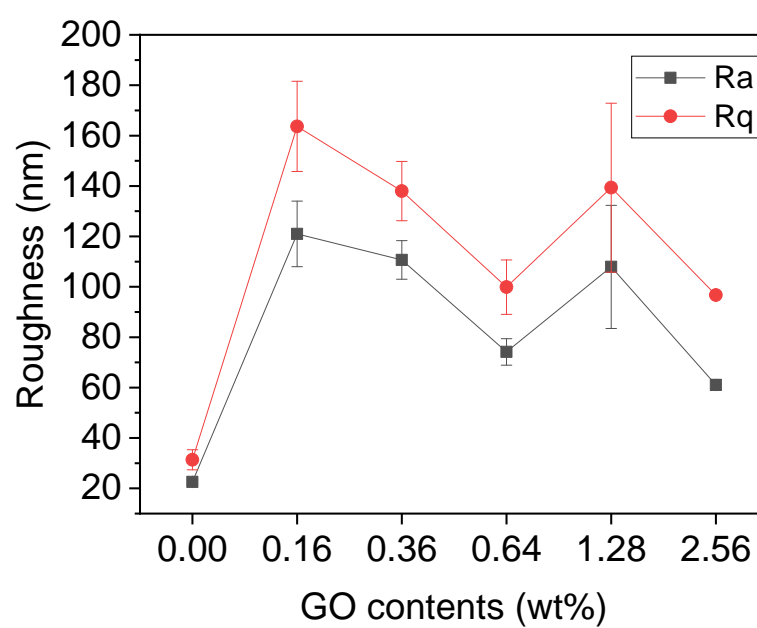

Figure S5. Roughness of GOSR membranes with different GO contents.

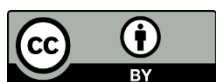

© 2019 by the authors. Submitted for possible open access publication under the terms and conditions of the Creative Commons Attribution (CC BY) license (<http://creativecommons.org/licenses/by/4.0/>).
